# Supplementary material for: Arabidopsis LIP5, a Positive Regulator of Multivesicular Body Biogenesis, Is a Critical Target of Pathogen-Responsive MAPK Cascade in Plant Basal Defense
Source: PLOS journal article supplement (doi:10.1371/journal.ppat.1004243), 2014-07-10
Supplement: S2 (10.1371/journal.ppat.1004243.s002) [file journal.ppat.1004243.s002]

Figure S2

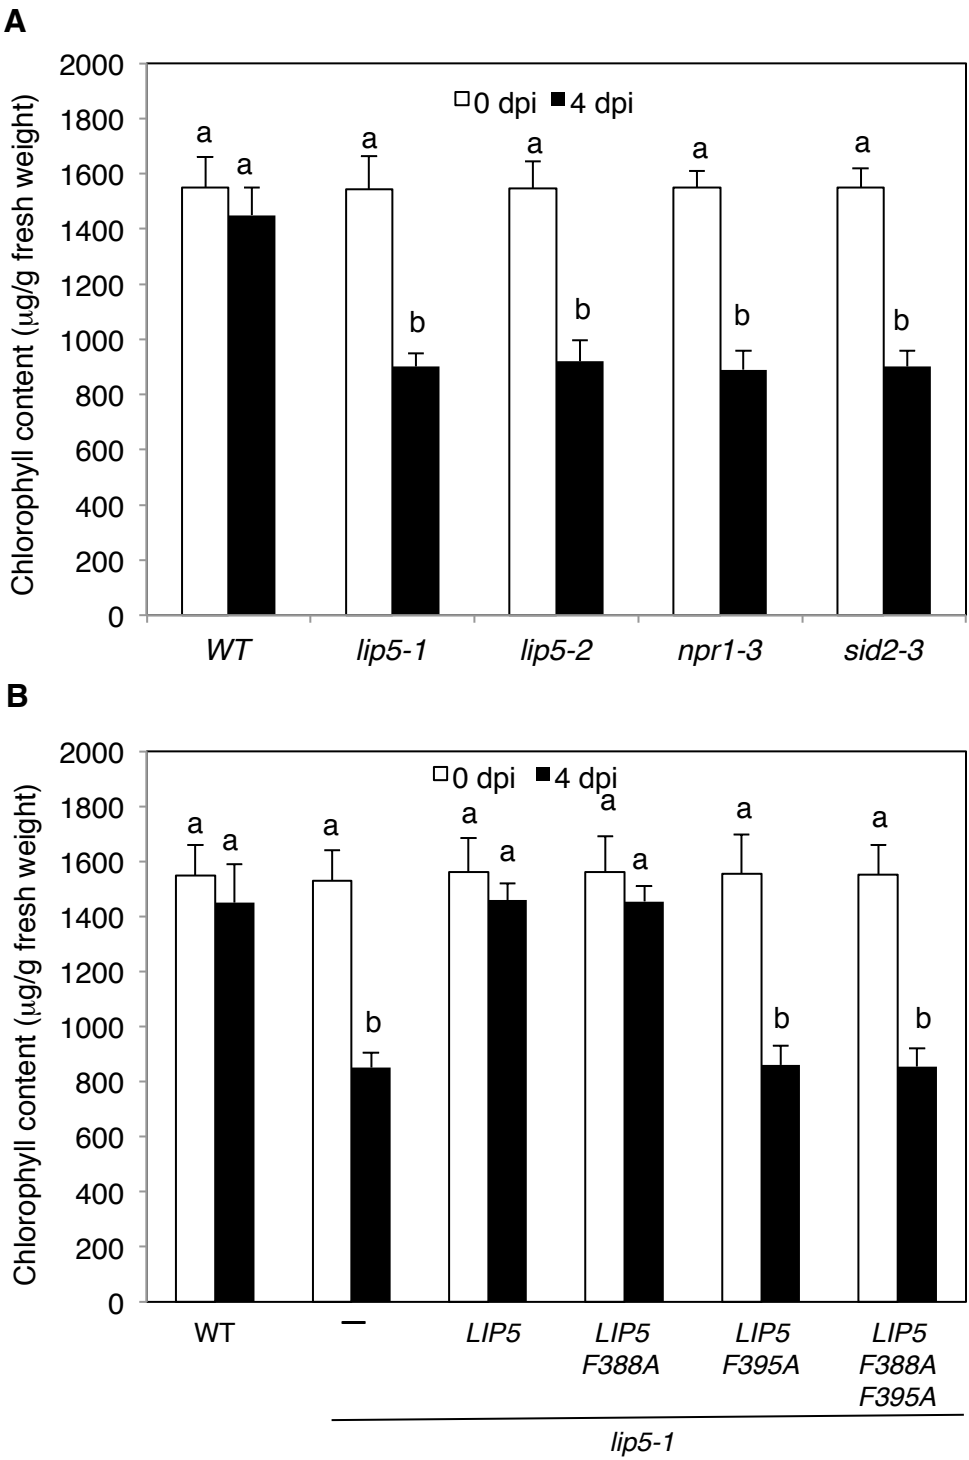

**Figure S2.** Effects of *Pst*DC3000 Infection on Chlorophyll Contents of Infected Leaves.

**(A)** Chlorophyll contents of infected leaves of Wild-type (WT), *lip5*, *npr1* and *sid2* mutant plants. Plants were infiltrated with a suspension of the virulent *Pst*DC3000 strain ( $OD_{600} = 0.0002$  in 10 mM  $MgCl_2$ ). Samples were taken at 0 and 4 dpi for determination of chlorophyll content. The means and standard errors were calculated from 10 plants for each mutant. According to Duncan's multiple range test ( $P=0.05$ ), chlorophyll contents do not differ if they are indicated with the same letter.

**(B)** Chlorophyll contents of infected leaves of WT, *lip5-1* and *lip5-1* mutant plants complemented with wild-type or mutant *LIP5* genes. Pathogen inoculation and chlorophyll content determination were performed as in **A**.
