# Supplementary material for: Arabidopsis LIP5, a Positive Regulator of Multivesicular Body Biogenesis, Is a Critical Target of Pathogen-Responsive MAPK Cascade in Plant Basal Defense
Source: PLOS journal article supplement (doi:10.1371/journal.ppat.1004243), 2014-07-10
Supplement: S6 (10.1371/journal.ppat.1004243.s006) [file journal.ppat.1004243.s006]

Figure S6

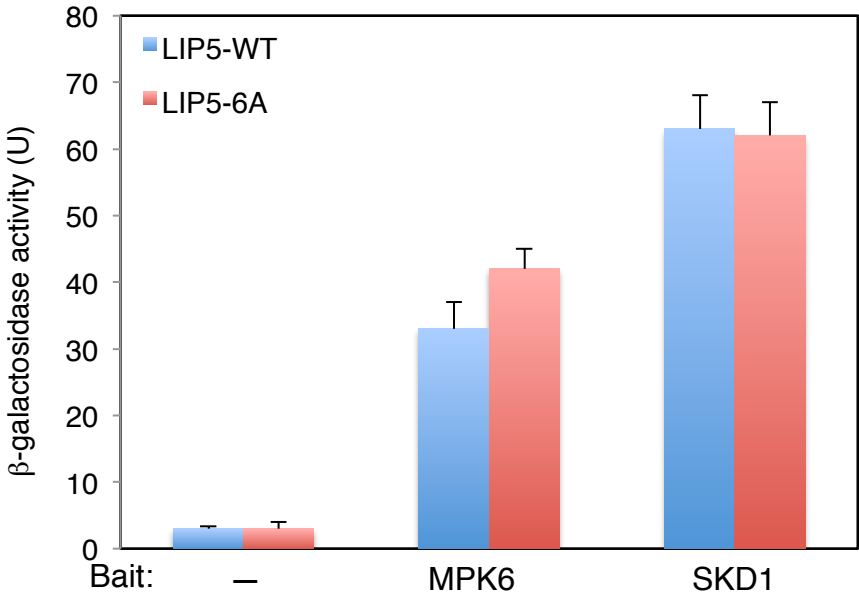

**Figure S6.** Normal interaction of LIP5<sup>6A</sup> with MPK6 and SKD1 in yeast cells. Full-length *LIP5*<sup>6A</sup> coding sequence was introduced into the pAD-Gal4 prey vector and was cotransformed with an empty bait vector (-) or with the pBD-MPK6 and pBD-SKD1 fusion bait vectors into yeast cells. Yeast transformants were analyzed for *LacZ* reporter gene expression through assays of  $\beta$ -galactosidase activity using ONPG as a substrate. Five separate colonies per construct were used for assays of *LacZ*  $\beta$ -galactosidase activity.
